# Supplementary material
Source: PubMed Central journal article supplement (PMC2662262)
Supplement: supp_283_48_33347__1.pdf [file supp_283_48_33347__1.pdf]

---

## Kyu-Sang Park

---

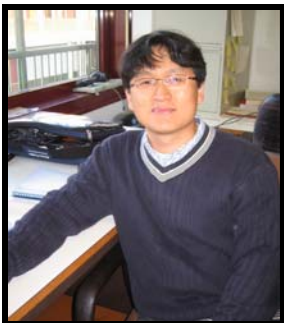

**Current Position:** Visiting scientist (2006-2009) in the laboratory of Prof. C. B. Wollheim in the Department of Physiology and Metabolism at the University of Geneva in Switzerland; Associate Professor in the Department of Physiology at Wonju College of Medicine at Yonsei University in Korea

**Education:** M.D. (1993) and Ph.D. in Physiology (1998) from Yonsei University in Korea

**Non-scientific Interests:** Playing acoustic and electric guitar

I have studied and worked at Yonsei University for 20 years except for the three years I spent at the Korean National Institute of Health (KNIH) in military service. My doctoral thesis focused on the changes in the electrophysiological properties of cardiac myocyte induced by antidepressants under the guidance of Prof. Joong-Woo Lee. I have performed electrophysiological and fluorescence imaging experiments on neuronal and endocrine cells. I first became interested in mitochondria when I was involved in diabetic research at KNIH.

Currently, I am a visiting researcher in the laboratory of Prof. Wollheim at the University of Geneva where I am investigating the role of mitochondrial morphology and function in metabolism-secretion coupling of insulin-releasing cells.

---

## Andreas Wiederkehr

---

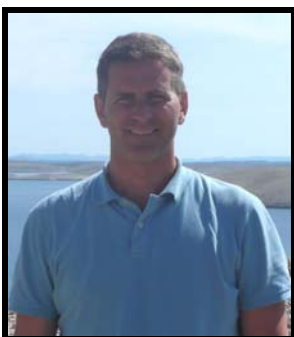

**Current Position:** Research Associate in the laboratory of Prof. C. B. Wollheim in the Department of Physiology and Metabolism at the University of Geneva in Switzerland

**Education:** Ph.D. in Biochemistry/Cell Biology (1997) from the University of Basel in Switzerland

**Non-scientific Interests:** My family, swimming and mountain climbing

Following my postdoctoral studies at the Biocenter in Basel, I became a fellow of the Swiss National Science Foundation to Yale University, where I have studied the molecular mechanisms of membrane trafficking in the yeast *Saccharomyces cerevisiae*. During my time in yeast research, I have identified plasma-membrane recycling, which is a novel trafficking pathway in this microorganism. Furthermore, my results have provided new insight into the tethering step of transport vesicles during exocytosis, which is a process conserved in higher eukaryotic cells. Since the initiation of my current research in the laboratory of Prof. C. B. Wollheim, I became interested in the role of mitochondria in metabolism-secretion coupling of the pancreatic  $\beta$ -cell. The focus of my research is to elucidate mitochondrial signals that are required to link nutrient metabolism to insulin granule exocytosis. In this context, our group is interested in the positioning and dynamics of  $\beta$ -cell mitochondria and their impact on insulin secretion.

---

**Read Drs. Park and Wiederkehr's article entitled:** Selective Actions of Mitochondrial Fission/Fusion Genes on Metabolism-Secretion Coupling in Insulin-releasing Cells  
<http://www.jbc.org/cgi/content/full/283/48/33347>
